# Supplementary material for: Doping cobalt into a [Zn7] cluster-based MOF to tune magnetic behaviour and induce fluorescence signal mutation
Source: Royal Society of Chemistry journal article supplement (doi:10.1039/c4dt00894d), 2014-01-01
Supplement: c4dt00894d1.pdf [file c4dt00894d1.pdf]

## Electronic Supporting Information (ESI)

for

### Doping cobalt into a [Zn<sub>7</sub>] cluster-based MOF for tuning magnetic behaviours and inducing fluorescence signal mutation

Yun-Wu Li,<sup>ab</sup> Sui-Jun Liu,<sup>a</sup> Tong-Liang Hu<sup>\*a</sup> and Xian-He Bu<sup>a</sup>

<sup>a</sup>*Department of Chemistry, TKL of Metal- and Molecule-Based Material Chemistry, and Collaborative Innovation Center of Chemical Science and Engineering (Tianjin), Nankai University, Tianjin 300071, P. R. China.*

<sup>b</sup>*School of Chemistry and Chemical Engineering, and Shandong Provincial Key Laboratory of Chemical Energy Storage and Novel Cell Technology, Liaocheng University, Liaocheng 252000, P. R. China.*

---

\*To whom correspondence should be addressed. E-mail: [tlhu@nankai.edu.cn](mailto:tlhu@nankai.edu.cn)

---

## Experimental Section

### Materials and methods.

All chemicals were commercially purchased and used as received.

Elemental analyses (C, H, and N) were performed on a Perkin-Elmer 240C analyzer (Perkin-Elmer, USA). Inductively coupled plasma (ICP) analysis was carried out on a Perkin-Elmer Optima 3300 DV spectrometer. The X-ray powder diffraction (XRPD) was recorded on a Rigaku D/Max-2500 diffractometer at 40 kV, 100 mA for a Cu-target tube and a graphite monochromator. Simulation of the XRPD spectra were carried out by the single-crystal data and diffraction-crystal module of the Mercury (Hg) program available free of charge *via* the Internet at <http://www.iucr.org>. IR spectrum was measured in the range of 400-4000  $\text{cm}^{-1}$  on a Tensor 27 OPUS FT-IR spectrometer using KBr pellets (Bruker, German). UV-vis spectrum was recorded at room temperature on a computer-controlled Jasco V-550 Spectrometer (JASCO Corp.) Fluorescence spectra were recorded at room temperature on a Varian Cary Eclipse fluorescence spectrometer (Varian, USA).

### X-ray Crystallography.

The crystallographic data of **Co-Zn-MOF** were collected on a Rigaku SCX-mini diffractometer at 298(2) K with Mo-K $\alpha$  radiation ( $\lambda = 0.71073 \text{ \AA}$ ). The crystal data were solved by direct methods and refined by a full-matrix least-square method on  $F^2$  using the *SHELXL-97* crystallographic software package.<sup>S1</sup> Zinc and cobalt atoms in **Co-Zn-MOF** were found from *E*-maps and other non-hydrogen atoms were located in successive difference Fourier syntheses. But zinc and cobalt atoms possess site-occupancy disorder in the same position which is confirmed by the inductively coupled plasma (ICP) analysis and magnetism measurements. The final refinement was performed by full matrix least-squares methods with anisotropic thermal parameters for non-hydrogen atoms on  $F^2$ . The hydrogen atoms of organic ligands were added theoretically, riding on the concerned atoms and refined with fixed thermal factors, and those of OH groups were located in a difference map and were refined with an O–H distance restraint of 0.85(1)  $\text{\AA}$ . Lattice water hydrogen atoms were not added in **Co-Zn-MOF F**. Further details of crystal data and structure refinement for **Co-Zn-MOF** were summarized as follows. Selected bond lengths of **Co-Zn-MOF** were given in Table S1. Full crystallographic data for **Co-Zn-MOF** have been deposited with the CCDC (955704). These data can be obtained free of charge from The Cambridge Crystallographic Data Centre *via* [www.ccdc.cam.ac.uk/data\\_request/cif](http://www.ccdc.cam.ac.uk/data_request/cif).<sup>S2</sup>

---

## Reference

S1 (a) G. M. Sheldrick, *SHELXL97, Program for Crystal Structure Refinement*; University of Göttingen: Göttingen, Germany, 1997; (b) G. M. Sheldrick, *SHELXS97, Program for Crystal Structure Solution*; University of Göttingen: Göttingen, Germany, 1997.

S2 The checkcif program available at: <http://journals.iucr.org/services/cif/checkcif.html>.

**Crystal data for Co-Zn-MOF:**  $C_{48}H_{34}N_{24}O_9Zn_5Co_2$ ,  $Mr = 1535.85$ ; Trigonal,  $R-3c$ ;  $a = 13.988(2) \text{ \AA}$ ,  $b = 13.988(2) \text{ \AA}$ ,  $c = 47.981(10) \text{ \AA}$ ,  $\gamma = 120^\circ$ ;  $V = 8130(2) \text{ \AA}^3$ ;  $Z = 6$ ;  $D_{calc} = 1.880 \text{ Mg/m}^3$ ;  $T = 298(2) \text{ K}$ .; Reflections collected/unique = 21852/1597,  $R_{int} = 0.0545$ ;  $R_I = 0.0382$ ,  $wR_2 = 0.0759$  ( $I > 2\theta(I)$ );  $R_I = 0.0444$ ,  $wR_2 = 0.0783$  (all data) and  $GOF = 1.096$ .

**Crystal data for Zn-MOF:**  $C_{48}H_{34}N_{24}O_9Zn_7$ ,  $Mr = 1548.58$ ; Trigonal,  $R-3c$ ;  $a = 13.934(2) \text{ \AA}$ ,  $b = 13.934(2) \text{ \AA}$ ,  $c = 48.052(10) \text{ \AA}$ ,  $\gamma = 120^\circ$ ;  $V = 8080(2) \text{ \AA}^3$ ;  $Z = 6$ ;  $D_{calc} = 1.910 \text{ Mg/m}^3$ ;  $T = 293(2) \text{ K}$ .; Reflections collected/unique = 24128/2065,  $R_{int} = 0.1216$ ;  $R_I = 0.0507$ ,  $wR_2 = 0.1109$  ( $I > 2\theta(I)$ );  $R_I = 0.0785$ ,  $wR_2 = 0.1231$  (all data) and  $GOF = 1.044$ .

---

Figures in Supporting Information

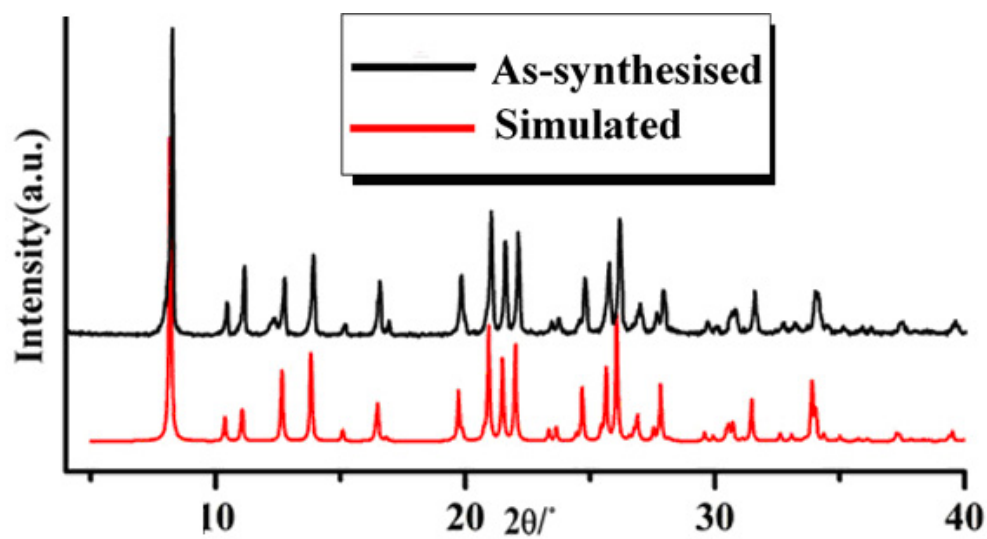

Fig. S1 XRPD patterns for Co-Zn-MOF.

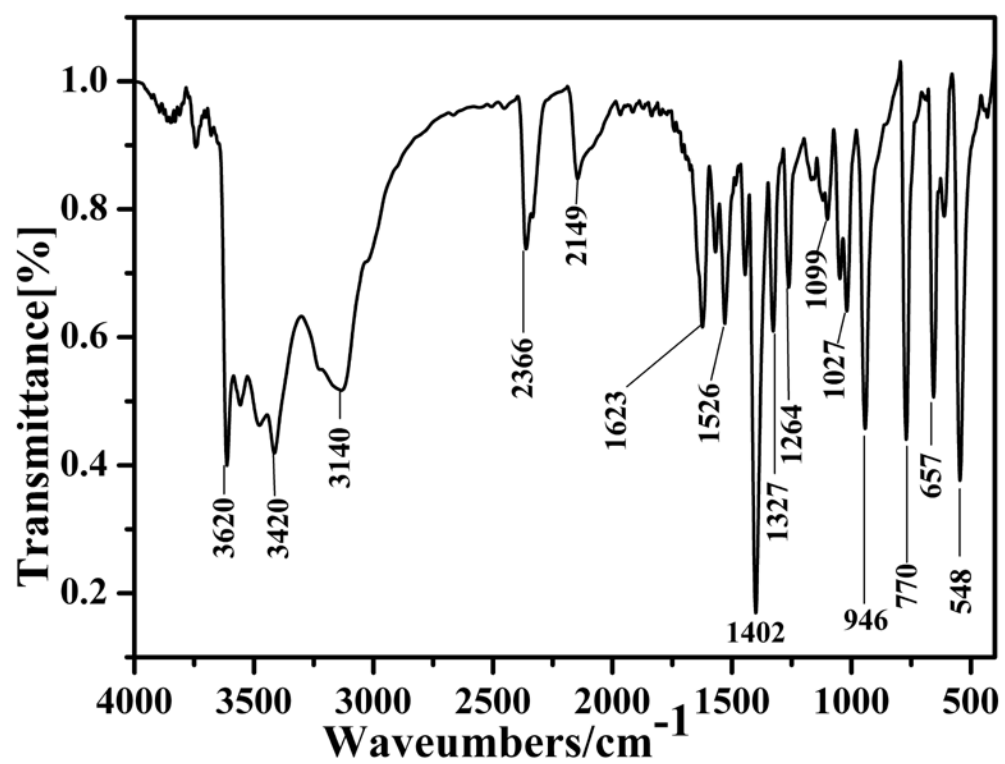

Fig. S2 IR spectrum of compound Co-Zn-MOF.

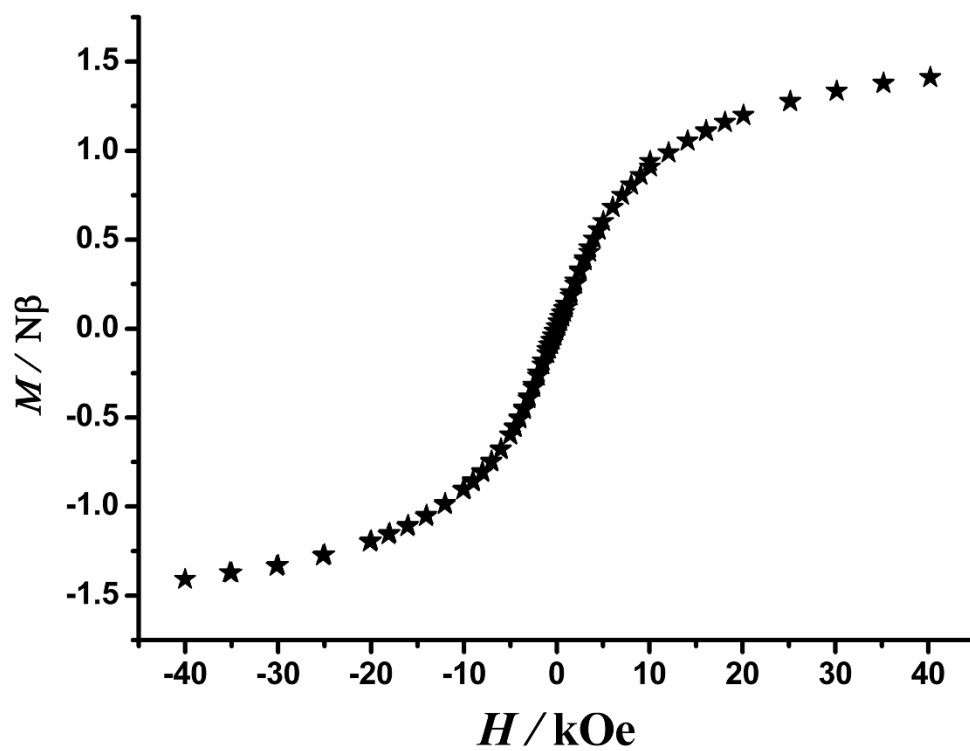

**Fig. S3** The magnetic hysteresis loop at 2 K for **Co-Zn-MOF**.

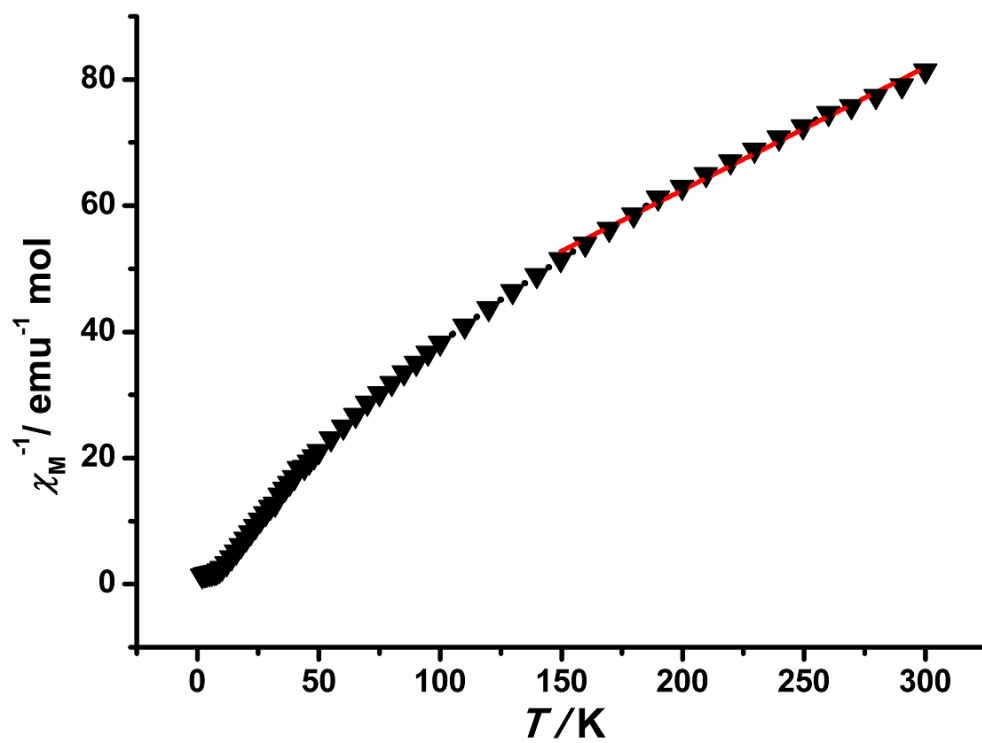

**Fig. S4** The  $\chi_M^{-1}$  vs.  $T$  curve ( $\blacktriangledown$ ) for Co-Zn-MOF (red solid line for the Curie–Weiss fitting).

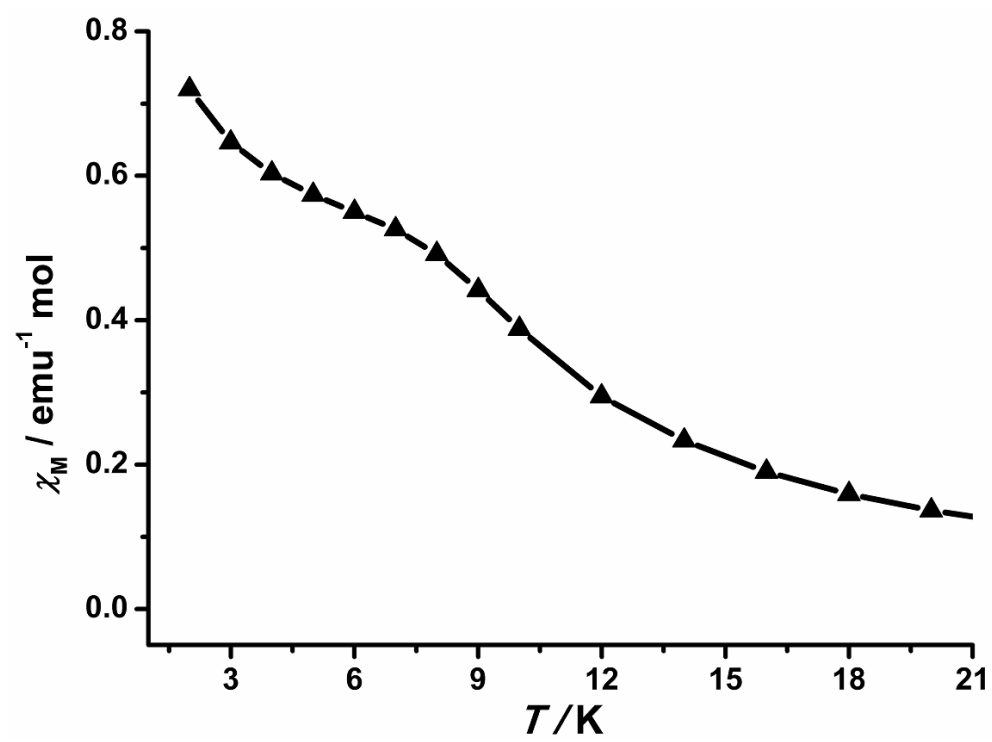

**Fig. S5** The  $\chi_M$  vs.  $T$  curve ( $\blacktriangle$ ) at 2-20 K for **Co-Zn-MOF**.



**Table S1** The selected bond lengths [Å] and angles [°] of compound **Co-Zn-MOF**.

| <b>Co-Zn-MOF (M=Co<sub>2/7</sub>/Zn<sub>5/7</sub>)</b> |            |                     |            |
|--------------------------------------------------------|------------|---------------------|------------|
| M(1)-O(2)#7                                            | 1.961(6)   | M(2)-O(1)#1         | 1.937(3)   |
| M(1)-O(2)#8                                            | 1.961(6)   | M(2)-O(1)           | 1.937(3)   |
| M(1)-O(2)                                              | 1.961(6)   | M(2)-N(1)#1         | 2.041(3)   |
| M(1)-O(1)#7                                            | 1.961(3)   | M(2)-N(1)           | 2.041(3)   |
| M(1)-O(1)#8                                            | 1.961(3)   | M(3)-O(2)#2         | 1.931(6)   |
| M(1)-O(1)                                              | 1.961(3)   | M(3)-O(2)#3         | 1.931(6)   |
| M(3)-O(2)#4                                            | 1.931(6)   | M(3)-N(4)           | 2.012(3)   |
| M(3)-N(4)#5                                            | 2.012(3)   | O(2)-M(3)#3         | 1.931(6)   |
| M(3)-N(4)#6                                            | 2.012(3)   | O(2)-M(3)#3         | 1.931(6)   |
| O(2)#7-Zn(1)-O(2)#8                                    | 20.3(4)    | O(1)#1-Zn(2)-O(1)   | 109.90(19) |
| O(2)#7-Zn(1)-O(2)                                      | 20.3(4)    | O(1)#1-Zn(2)-N(1)#1 | 116.82(13) |
| O(2)#8-Zn(1)-O(2)                                      | 20.3(4)    | O(1)-Zn(2)-N(1)#1   | 111.37(12) |
| O(2)#7-Zn(1)-O(1)#7                                    | 96.1(3)    | O(1)#1-Zn(2)-N(1)   | 111.37(12) |
| O(2)#8-Zn(1)-O(1)#7                                    | 113(3)     | O(1)-Zn(2)-N(1)     | 116.82(13) |
| O(2)-Zn(1)-O(1)#7                                      | 113(3)     | N(1)#1-Zn(2)-N(1)   | 89.52(18)  |
| O(2)#7-Zn(1)-O(1)#8                                    | 113(3)     | O(2)#2-Zn(3)-O(2)#3 | 20.6(4)    |
| O(2)#8-Zn(1)-O(1)#8                                    | 96.1(3)    | O(2)#2-Zn(3)-O(2)#4 | 20.6(4)    |
| O(2)-Zn(1)-O(1)#8                                      | 113(3)     | O(2)#3-Zn(3)-O(2)#4 | 20.6(4)    |
| O(1)#7-Zn(1)-O(1)#8                                    | 111.07(9)  | O(2)#2-Zn(3)-N(4)#5 | 108(2)     |
| O(2)#7-Zn(1)-O(1)                                      | 113(3)     | O(2)#3-Zn(3)-N(4)#5 | 128.0(10)  |
| O(2)#8-Zn(1)-O(1)                                      | 113(3)     | O(2)#4-Zn(3)-N(4)#5 | 113(3)     |
| O(2)-Zn(1)-O(1)                                        | 96.1(3)    | O(2)#2-Zn(3)-N(4)#6 | 113(3)     |
| O(1)#7-Zn(1)-O(1)                                      | 111.07(9)  | O(2)#3-Zn(3)-N(4)#6 | 108(2)     |
| O(1)#8-Zn(1)-O(1)                                      | 111.07(9)  | O(2)#3-Zn(3)-N(4)   | 113(3)     |
| O(2)#4-Zn(3)-N(4)#6                                    | 128.0(10)  | O(2)#4-Zn(3)-N(4)   | 108(2)     |
| N(4)#5-Zn(3)-N(4)#6                                    | 101.61(10) | N(4)#5-Zn(3)-N(4)   | 101.61(10) |
| O(2)#2-Zn(3)-N(4)                                      | 128.0(10)  | N(4)#6-Zn(3)-N(4)   | 101.61(10) |

Symmetry transformations used to generate equivalent atoms: #1: -x+4/3, -x+y+2/3, -z+1/6; #2: x-y, x, -z; #3: -x+1, -y+1, -z; #4: y, -x+y+1, -z; #5: -y+1, x-y+1, z; #6: -x+y, -x+1, z; #7: -x+y+1, -x+1, z; #8: -y+1, x-y, z.

**Table S2** The selected bond lengths [Å] and angles [°] of compound **Zn-MOF**.

| <b>Zn-MOF parent</b> |            |                   |            |
|----------------------|------------|-------------------|------------|
| Zn(1)-O(2)#1         | 1.927(7)   | Zn(2)-N(1)        | 2.035(4)   |
| Zn(1)-O(1)#2         | 1.959(4)   | Zn(3)-O(2)        | 1.886(7)   |
| Zn(1)-O(1)#3         | 1.959(4)   | Zn(3)-N(4)        | 2.005(4)   |
| Zn(1)-O(1)           | 1.959(4)   | Zn(3)-N(4)#5      | 2.005(4)   |
| Zn(2)-O(1)           | 1.925(4)   | Zn(3)-N(4)#6      | 2.005(4)   |
| Zn(2)-O(1)#4         | 1.925(4)   | Zn(3)-H(2)        | 2.050(10)  |
| Zn(2)-N(1)#4         | 2.035(4)   | O(2)-Zn(1)#1      | 1.927(7)   |
| O(2)#1-Zn(1)-O(1)#2  | 107.93(13) | O(1)-Zn(2)-N(1)   | 116.37(17) |
| O(2)#1-Zn(1)-O(1)#3  | 107.93(13) | O(1)#4-Zn(2)-N(1) | 111.37(16) |

---

|                     |            |                     |            |
|---------------------|------------|---------------------|------------|
| O(1)#2-Zn(1)-O(1)#3 | 110.97(12) | N(1)#4-Zn(2)-N(1)   | 89.4(2)    |
| O(2)#1-Zn(1)-O(1)   | 107.93(13) | O(2)-Zn(3)-N(4)     | 116.69(11) |
| O(1)#2-Zn(1)-O(1)   | 110.97(12) | O(2)-Zn(3)-N(4)#5   | 116.69(11) |
| O(1)#3-Zn(1)-O(1)   | 110.97(12) | N(4)-Zn(3)-N(4)#5   | 101.39(13) |
| O(1)-Zn(2)-O(1)#4   | 110.6(2)   | O(2)-Zn(3)-N(4)#6   | 116.69(11) |
| O(1)-Zn(2)-N(1)#4   | 111.38(16) | N(4)-Zn(3)-N(4)#6   | 101.39(13) |
| O(1)#4-Zn(2)-N(1)#4 | 116.37(17) | N(4)#5-Zn(3)-N(4)#6 | 101.39(13) |

Symmetry transformations used to generate equivalent atoms: #1:  $-x+4/3, -y+5/3, -z-1/3$ ;  
#2:  $-y+1, x-y+1, z$ ; #3:  $-x+y, -x+1, z$ ; #4:  $x-y+2/3, -y+4/3, -z-1/6$ ; #5:  $-x+y+1, -x+2, z$ ; #6:  $-y+2, x-y+1, z$ .
